# Supplementary material for: Deep segmentation networks predict survival of non-small cell lung cancer
Source: PubMed Central journal article supplement (PMC6872742; doi:10.1038/s41598-019-53461-2), 2019-11-21
Supplement: 41598_2019_53461_MOESM1_ESM.pdf [file 41598_2019_53461_MOESM1_ESM.pdf]

# Deep segmentation networks predict survival of non-small cell lung cancer

Stephen Baek<sup>1,2,3,+</sup>, Yusen He<sup>1,+</sup>, Bryan G. Allen<sup>2</sup>, John M. Buatti<sup>2</sup>, Brian J. Smith<sup>5</sup>, Ling Tong<sup>4</sup>, Zhiyu Sun<sup>1</sup>, Jia Wu<sup>6</sup>, Maximilian Diehn<sup>6</sup>, Billy W. Loo<sup>6</sup>, Kristin A. Plichta<sup>2</sup>, Steven N. Seyedin<sup>2</sup>, Maggie Gannon<sup>2</sup>, Katherine R. Cabel<sup>2</sup>, Yusung Kim<sup>2,\*</sup>, and Xiaodong Wu<sup>2,3,\*</sup>

<sup>1</sup>University of Iowa, Department of Industrial and Systems Engineering, Iowa City, IA 52242, United States

<sup>2</sup>University of Iowa, Department of Radiation Oncology, Iowa City, IA 52242, United States

<sup>3</sup>University of Iowa, Department of Electrical and Computer Engineering, Iowa City, IA 52242, United States

<sup>4</sup>University of Iowa, Department of Business Analytics, Iowa City, IA 52242, United States

<sup>5</sup>University of Iowa, Department of Biostatistics, Iowa City, IA 52242, United States

<sup>6</sup>Stanford University, Stanford Cancer Institute, Palo Alto, CA 94304, United States

{yusung-kim, xiaodong-wu}@uiowa.edu

+these authors contributed equally to this work

## Extended Data

**Extended Data Table 1.** Summary statistics of the data set

|                  | Mean             | Median                              | Std. Dev.         | Min              | Max               |
|------------------|------------------|-------------------------------------|-------------------|------------------|-------------------|
| Age at Diagnosis | 70.34            | 71.00                               | 10.59             | 47.00            | 90.00             |
| Age at SBRT      | 71.90            | 72.36                               | 10.58             | 47.13            | 90.17             |
| Group Staging    | I<br>37          | II<br>10                            | III<br>14         | IV<br>25         | Other*<br>10      |
| Smoking Status   | Non-smoker<br>10 | Quit<br>67                          | Light smoker<br>1 | Smoker<br>18     |                   |
| Survival Status  | 2yr              | Type<br>Overall<br>Disease-specific | Alive<br>61<br>67 | Dead<br>35<br>25 | Other**<br>0<br>4 |
|                  | 5yr              | Overall<br>Disease-specific         | 26<br>58          | 48<br>14         | 22<br>24          |

\*Patients with no staging information.

\*\*Patients unqualified for the survival category due to the insufficient length of follow-up after initial diagnosis.

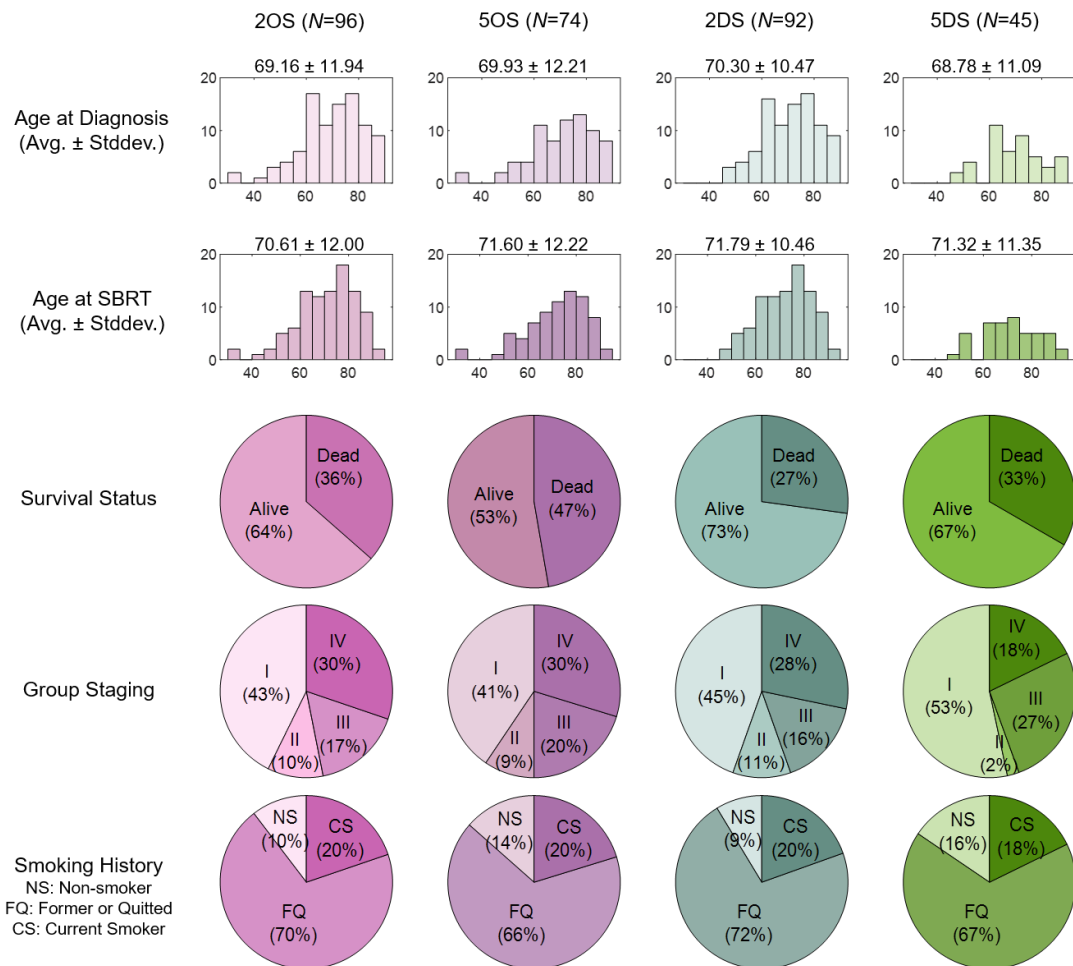

**Extended Data Figure 1.** Summary statistics of the patients utilized in this study

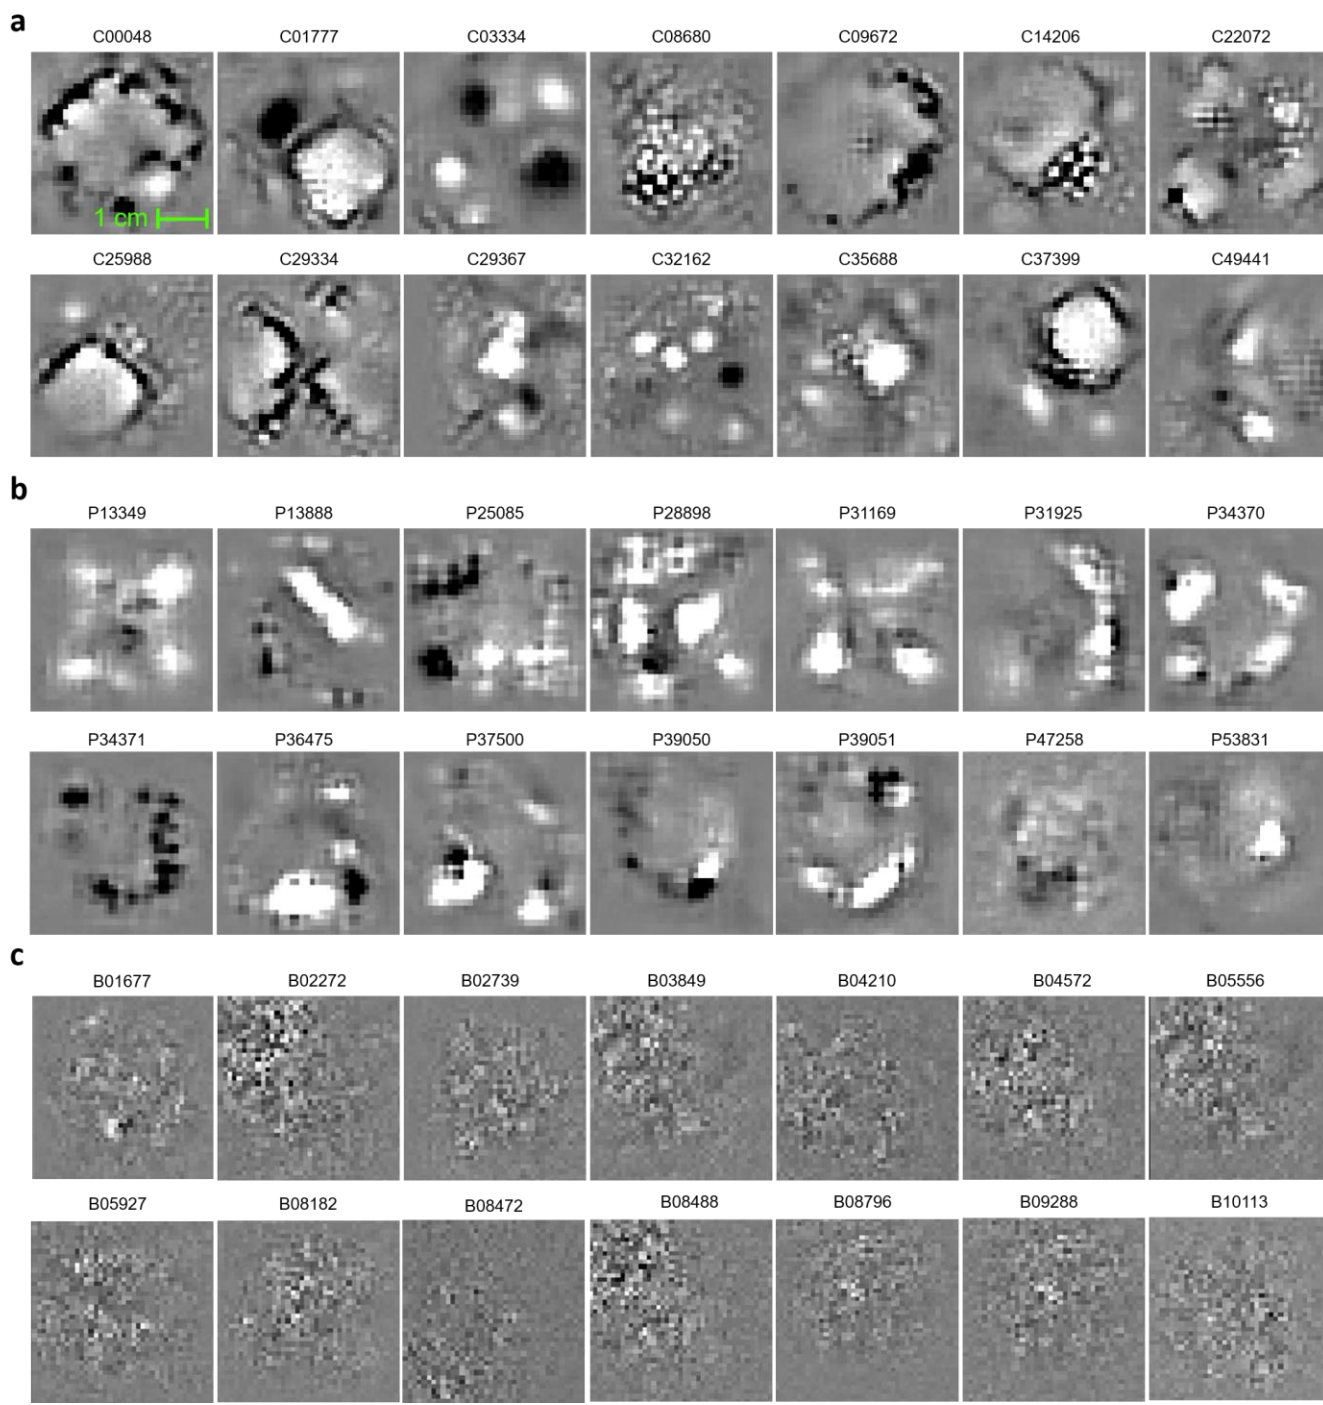

**Extended Data Figure 2.** Visualization of survival-related features captured by CNNs

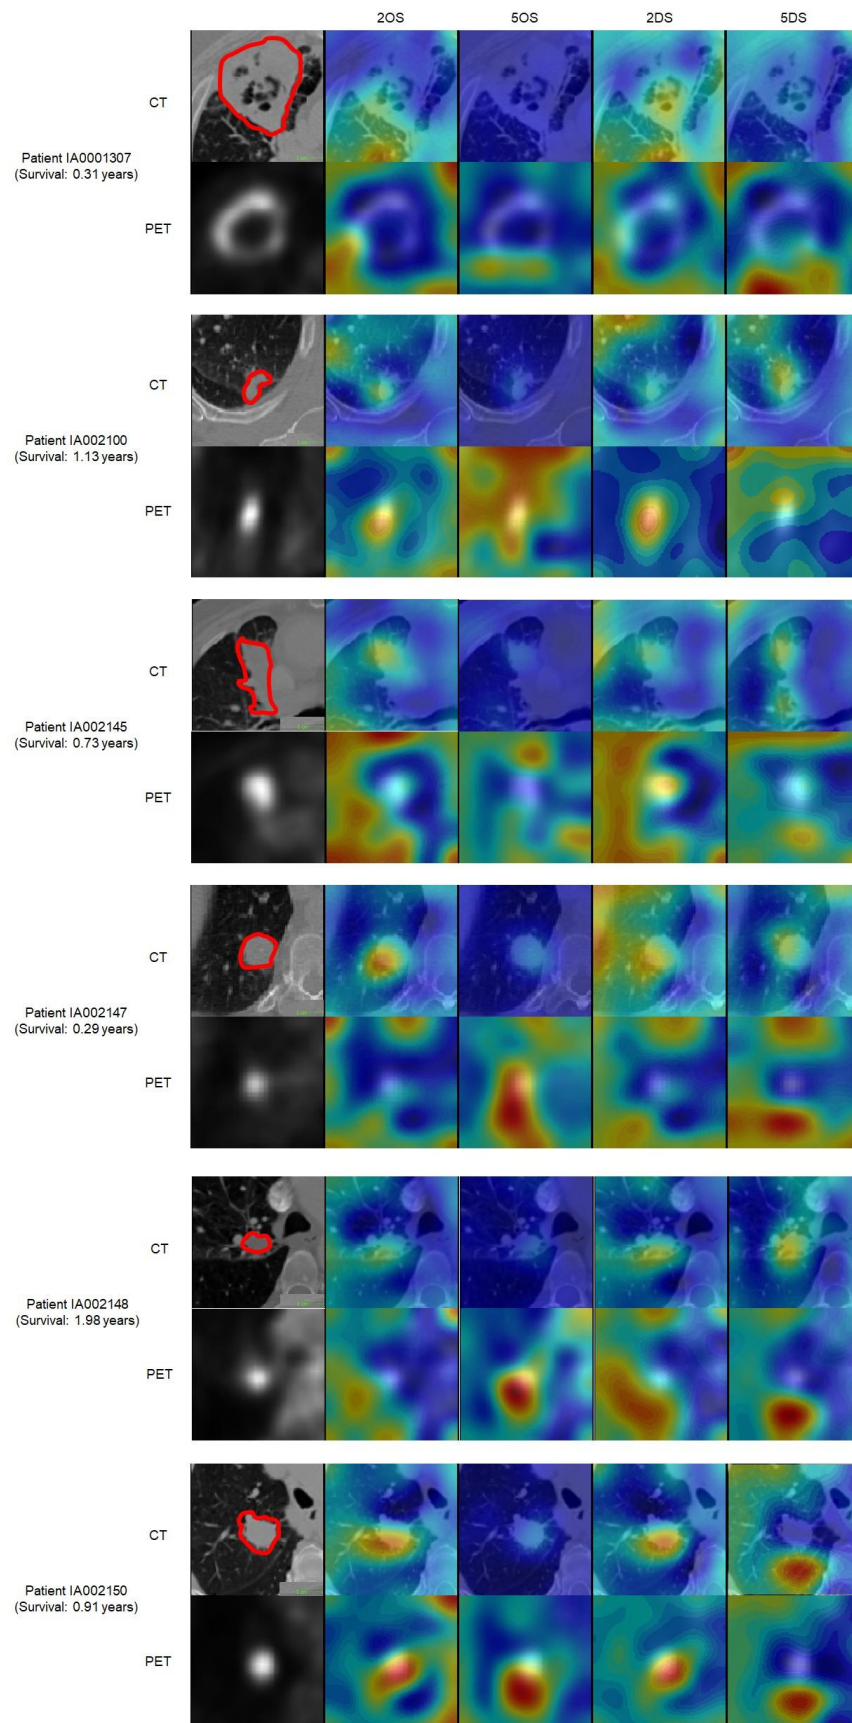

**Extended Data Figure 3.** Risk map visualization of the patients under 2 years of survival.



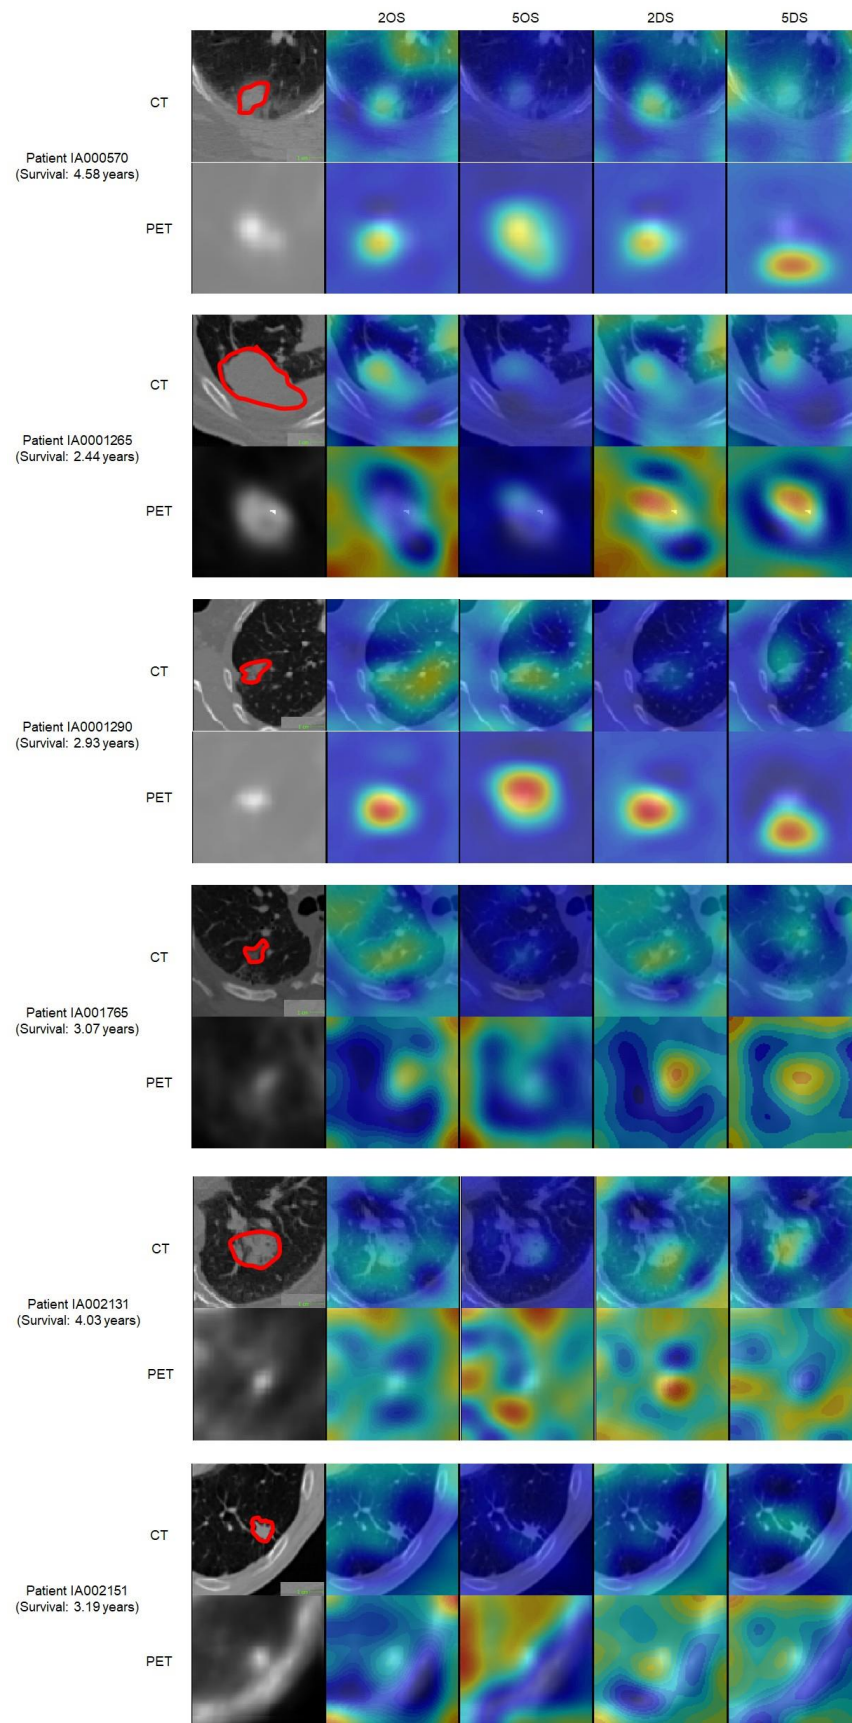

**Extended Data Figure 4.** Risk map visualization of the patients between 2 and 5 years of survival.

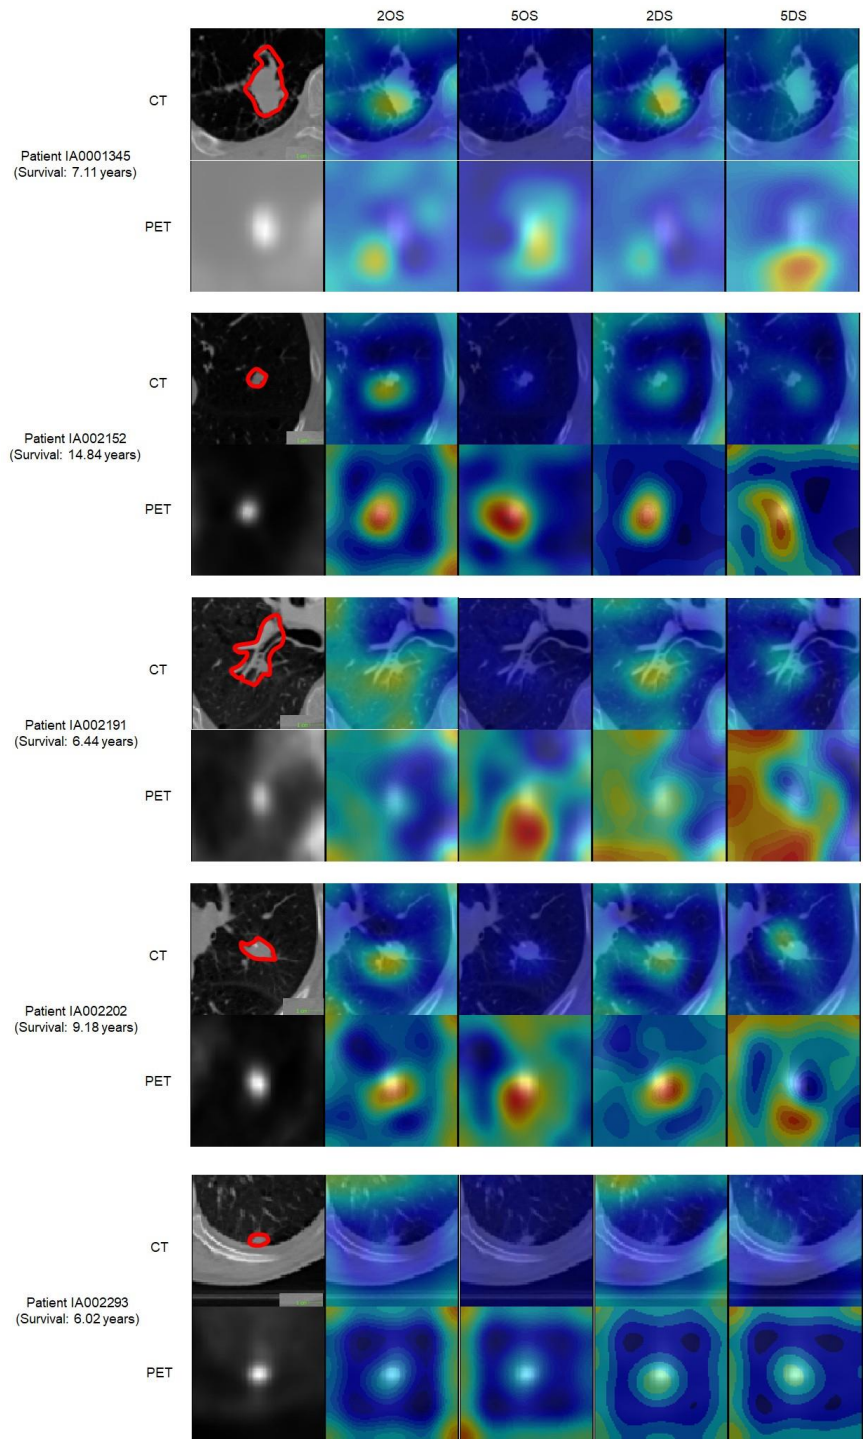

**Extended Data Figure 5.** Risk map visualization of the patients over 5 years of survival.

**Extended Data Table 2.** Predictive power of linear model on 2-yr./5-yr. survival outcome

| Features                |    | (a) TLG             |                     | (b) Radiomic <sup>28</sup> |                     | (c) Benchmark <sup>27</sup> |                     | (d) CT U-Net        |                     | (e) PET U-Net       |                     | (f) All U-Net       |                     |
|-------------------------|----|---------------------|---------------------|----------------------------|---------------------|-----------------------------|---------------------|---------------------|---------------------|---------------------|---------------------|---------------------|---------------------|
|                         |    | 2-yr.               | 5-yr.               | 2-yr.                      | 5-yr.               | 2-yr.                       | 5-yr.               | 2-yr.               | 5-yr.               | 2-yr.               | 5-yr.               | 2-yr.               | 5-yr.               |
| Accuracy<br>(95% CI)    | OS | 0.53<br>(0.46-0.60) | 0.55<br>(0.47-0.63) | 0.62<br>(0.54-0.70)        | 0.65<br>(0.55-0.75) | 0.69<br>(0.65-0.73)         | 0.75<br>(0.70-0.80) | 0.84<br>(0.81-0.87) | 0.86<br>(0.80-0.92) | 0.83<br>(0.79-0.87) | 0.87<br>(0.80-0.94) | 0.86<br>(0.79-0.93) | 0.89<br>(0.85-0.94) |
|                         | DS | 0.57<br>(0.54-0.60) | 0.57<br>(0.52-0.62) | 0.64<br>(0.59-0.69)        | 0.80<br>(0.75-0.85) | 0.73<br>(0.67-0.80)         | 0.76<br>(0.69-0.83) | 0.86<br>(0.80-0.92) | 0.89<br>(0.84-0.94) | 0.87<br>(0.81-0.93) | 0.88<br>(0.83-0.93) | 0.88<br>(0.81-0.95) | 0.88<br>(0.82-0.94) |
| Sensitivity<br>(95% CI) | OS | 0.40<br>(0.27-0.53) | 0.32<br>(0.20-0.44) | 0.44<br>(0.34-0.54)        | 0.60<br>(0.53-0.67) | 0.63<br>(0.57-0.70)         | 0.69<br>(0.62-0.76) | 0.72<br>(0.61-0.83) | 0.81<br>(0.76-0.88) | 0.75<br>(0.68-0.82) | 0.82<br>(0.74-0.90) | 0.74<br>(0.67-0.81) | 0.82<br>(0.76-0.88) |
|                         | DS | 0.17<br>(0.11-0.23) | 0.33<br>(0.23-0.43) | 0.40<br>(0.31-0.49)        | 0.91<br>(0.86-0.96) | 0.68<br>(0.60-0.76)         | 0.70<br>(0.65-0.75) | 0.77<br>(0.67-0.87) | 0.84<br>(0.78-0.90) | 0.79<br>(0.70-0.88) | 0.85<br>(0.78-0.92) | 0.79<br>(0.73-0.85) | 0.86<br>(0.80-0.92) |
| Specificity<br>(95% CI) | OS | 0.66<br>(0.55-0.77) | 0.78<br>(0.71-0.85) | 0.80<br>(0.68-0.92)        | 0.68<br>(0.60-0.76) | 0.77<br>(0.70-0.84)         | 0.80<br>(0.75-0.85) | 0.91<br>(0.78-0.99) | 0.90<br>(0.83-0.97) | 0.90<br>(0.80-0.99) | 0.93<br>(0.84-0.99) | 0.91<br>(0.84-0.98) | 0.92<br>(0.84-0.99) |
|                         | DS | 0.97<br>(0.95-0.99) | 0.81<br>(0.71-0.91) | 0.88<br>(0.82-0.94)        | 0.70<br>(0.62-0.78) | 0.78<br>(0.72-0.84)         | 0.81<br>(0.76-0.86) | 0.92<br>(0.81-0.99) | 0.92<br>(0.86-0.98) | 0.90<br>(0.85-0.95) | 0.91<br>(0.84-0.98) | 0.91<br>(0.83-0.99) | 0.91<br>(0.86-0.96) |
| AUC<br>(95% CI)         | OS | 0.60<br>(0.46-0.74) | 0.63<br>(0.56-0.70) | 0.61<br>(0.48-0.74)        | 0.69<br>(0.60-0.78) | 0.70<br>(0.65-0.75)         | 0.72<br>(0.66-0.78) | 0.83<br>(0.75-0.91) | 0.85<br>(0.75-0.95) | 0.82<br>(0.73-0.89) | 0.87<br>(0.79-0.95) | 0.88<br>(0.80-0.96) | 0.89<br>(0.85-0.93) |
|                         | DS | 0.68<br>(0.61-0.75) | 0.68<br>(0.60-0.76) | 0.64<br>(0.57-0.71)        | 0.83<br>(0.79-0.87) | 0.72<br>(0.67-0.77)         | 0.73<br>(0.68-0.78) | 0.85<br>(0.75-0.95) | 0.85<br>(0.77-0.92) | 0.86<br>(0.79-0.93) | 0.88<br>(0.80-0.96) | 0.86<br>(0.81-0.91) | 0.88<br>(0.81-0.95) |

**Extended Data Table 3.** Predictive power on the extramural data set

| Features    |    | (a) Radiomics* |             | (b) Benchmark <sup>27</sup> |             | (c) CT U-Net |             |
|-------------|----|----------------|-------------|-----------------------------|-------------|--------------|-------------|
|             |    | 2-yr.          | 5-yr.       | 2-yr.                       | 5-yr.       | 2-yr.        | 5-yr.       |
| Accuracy    | OS | 0.46           | 0.71        | 0.6                         | 0.65        | 0.82         | 0.87        |
| (95% CI)    |    | (0.34-0.58)    | (0.62-0.80) | (0.50-0.70)                 | (0.53-0.77) | (0.77-0.87)  | (0.80-0.94) |
| Sensitivity | OS | 0.38           | 0.63        | 0.4                         | 0.45        | 0.75         | 0.9         |
| (95% CI)    |    | (0.30-0.46)    | (0.52-0.74) | (0.33-0.47)                 | (0.40-0.50) | (0.65-0.85)  | (0.80-0.99) |
| Specificity | OS | 0.59           | 0.74        | 0.83                        | 0.88        | 0.91         | 0.85        |
| (95% CI)    |    | (0.51-0.67)    | (0.67-0.81) | (0.72-0.94)                 | (0.80-0.96) | (0.87-0.95)  | (0.81-0.89) |
| AUC         | OS | 0.49           | 0.75        | 0.65                        | 0.71        | 0.87         | 0.9         |
| (95% CI)    |    | (0.40-0.58)    | (0.67-0.83) | (0.57-0.73)                 | (0.60-0.82) | (0.80-0.94)  | (0.82-0.98) |

\*The extramural data set does not have PET images, hence, only 6 features out of the original 17 features in Oikonomou *et al.*<sup>28</sup> were included.
